# Supplementary material
Source: MDPI journal article supplement (https://www.mdpi.com/1999-4907/12/7/891)
Supplement: s1 [file s1]

**Table S1.** Reference concentrations of heavy metals.

|                         | Cd<br>(mg kg <sup>-1</sup> ) | Cr<br>(mg kg <sup>-1</sup> ) | Ni<br>(mg kg <sup>-1</sup> ) | Zn<br>(mg kg <sup>-1</sup> ) | Mn<br>(mg kg <sup>-1</sup> ) | Fe<br>(mg kg <sup>-1</sup> ) |
|-------------------------|------------------------------|------------------------------|------------------------------|------------------------------|------------------------------|------------------------------|
| <b>Background value</b> | 0.310                        | 113.3                        | 39.1                         | 99.5                         | 794.0                        | 16140                        |

Background values are referred to [47].

**Table S2.** Grades of environment by potential ecological risk index.

| <b>E<sub>r</sub><sup>i</sup> value</b>  | <b>Grade of ecological risk of single trace metal</b> | <b>RI</b>      | <b>Grade of ecological risk to the environment</b> |
|-----------------------------------------|-------------------------------------------------------|----------------|----------------------------------------------------|
| E <sub>r</sub> <sup>i</sup> < 40        | Low ecological risk                                   | RI < 150       | Low ecological risk                                |
| 40 < E <sub>r</sub> <sup>i</sup> ≤ 80   | Moderate ecological risk                              | 150 < RI < 300 | Moderate ecological risk                           |
| 80 < E <sub>r</sub> <sup>i</sup> ≤ 160  | Appreciable ecological risk                           | 300 < RI < 600 | High ecological risk                               |
| 160 < E <sub>r</sub> <sup>i</sup> ≤ 320 | High ecological risk                                  | RI ≥ 600       | Significantly high ecological risk                 |

**Table S3.** Classification of contamination.

| <b>Class</b> | <b>Degree</b> | <b>Contamination</b> |       | <b>Ecological Risk</b> |
|--------------|---------------|----------------------|-------|------------------------|
|              |               | ICF                  | GCF   | RAC (%)                |
| I            | Low           | <1                   | <6    | <10                    |
| II           | Moderate      | 1–3                  | 6–12  | 10–30                  |
| III          | Considerable  | 3–6                  | 12–24 | 30–50                  |
| IV           | High          | >6                   | >24   | >50                    |
